# Supplementary material
Source: Research Square preprint supplement (doi:10.21203/rs.3.rs-9828015/v1)
Supplement: Supplementary file 1 [file e219d880deb21b20b91af801.docx]

Supporting Information

**Submicron traction-force mapping reveals mitochondrial regulation of nanoscale force coordination during rigidity sensing under oxidative stress**

Muhammad Anwar Ul Hassan1, Seok Gi Kim2,6, Dan Bi Im3, Jung Seung Lee3,4,5, Gwang Lee2,6*, Sungsu Park1,7*

1School of Mechanical Engineering, Sungkyunkwan University (SKKU), Suwon 16419, Korea

2Department of Molecular Science and Technology, Ajou University, Suwon 16499, Korea

3Department of MetaBioHealth, Sungkyunkwan University (SKKU), Suwon 16419, Korea

4Department of Biomedical Engineering, Sungkyunkwan University (SKKU), Suwon 16419, Korea

5Department of Intelligence Precision Healthcare Convergence, Sungkyunkwan University (SKKU), Suwon 16419, Korea

6Department of Physiology, Ajou University School of Medicine, Suwon 16499, Korea

7Institute of Quantum Biophysics (IQB), Sungkyunkwan University (SKKU), Suwon 16419, Korea

* Corresponding author: Gwang Lee; Sungsu Park

Tel: +82-31-219-4554; +82-31-290-7431

E-mail address: [glee@ajou.ac.kr](mailto:glee@ajou.ac.kr) (G.L), [nanopark@skku.edu](mailto:nanopark@skku.edu) (S. P.)


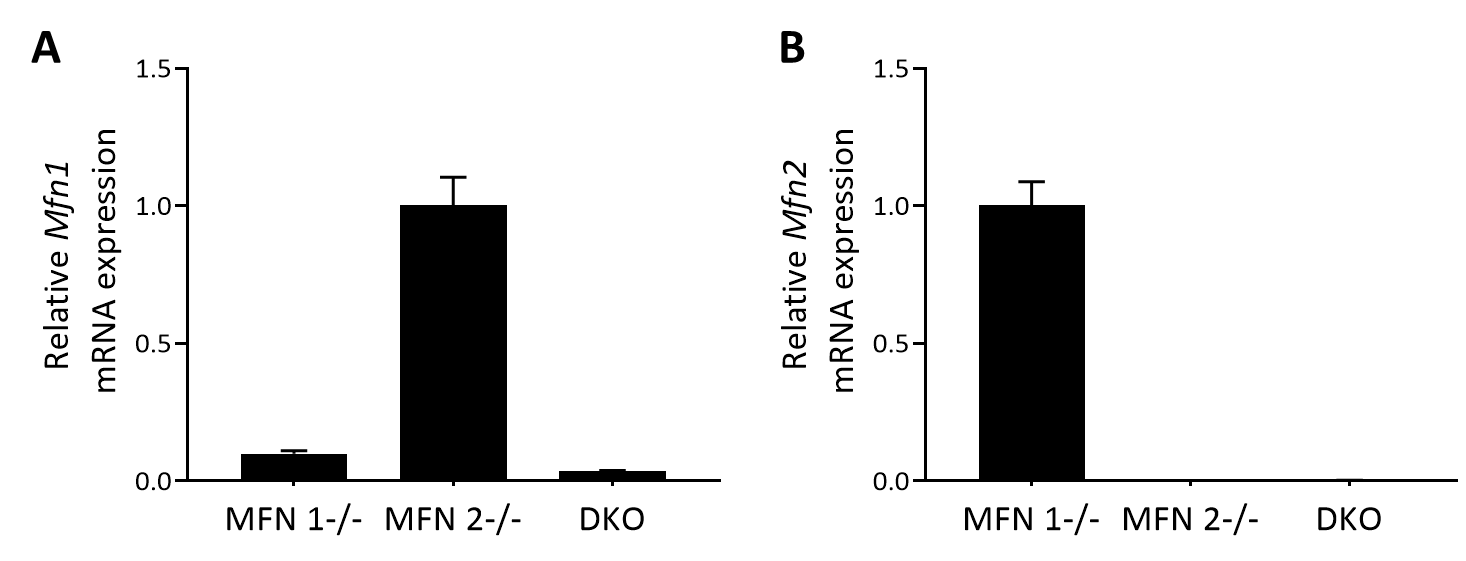


**Fig. S1.** Validation of mitofusin (MFN) knockout efficiency in MEF lines. Relative mRNA expression levels of (A) *Mfn1* and (B) *Mfn2* in MFN-deficient MEFs (MFN1-/-, MFN2-/-, and DKO), as determined by RT-qPCR. Gene expression levels were normalized to GAPDH as the internal reference gene and compared with the corresponding MEF line retaining wild-type expression of the target gene (e.g., *Mfn1* expression in MFN2-/- cells was used as the reference condition for *Mfn1* analysis). The results verify the significant loss of target transcripts in the corresponding knockout and double-knockout lines. Each bar represents mean ± standard deviation (SD) (n = 4).

**
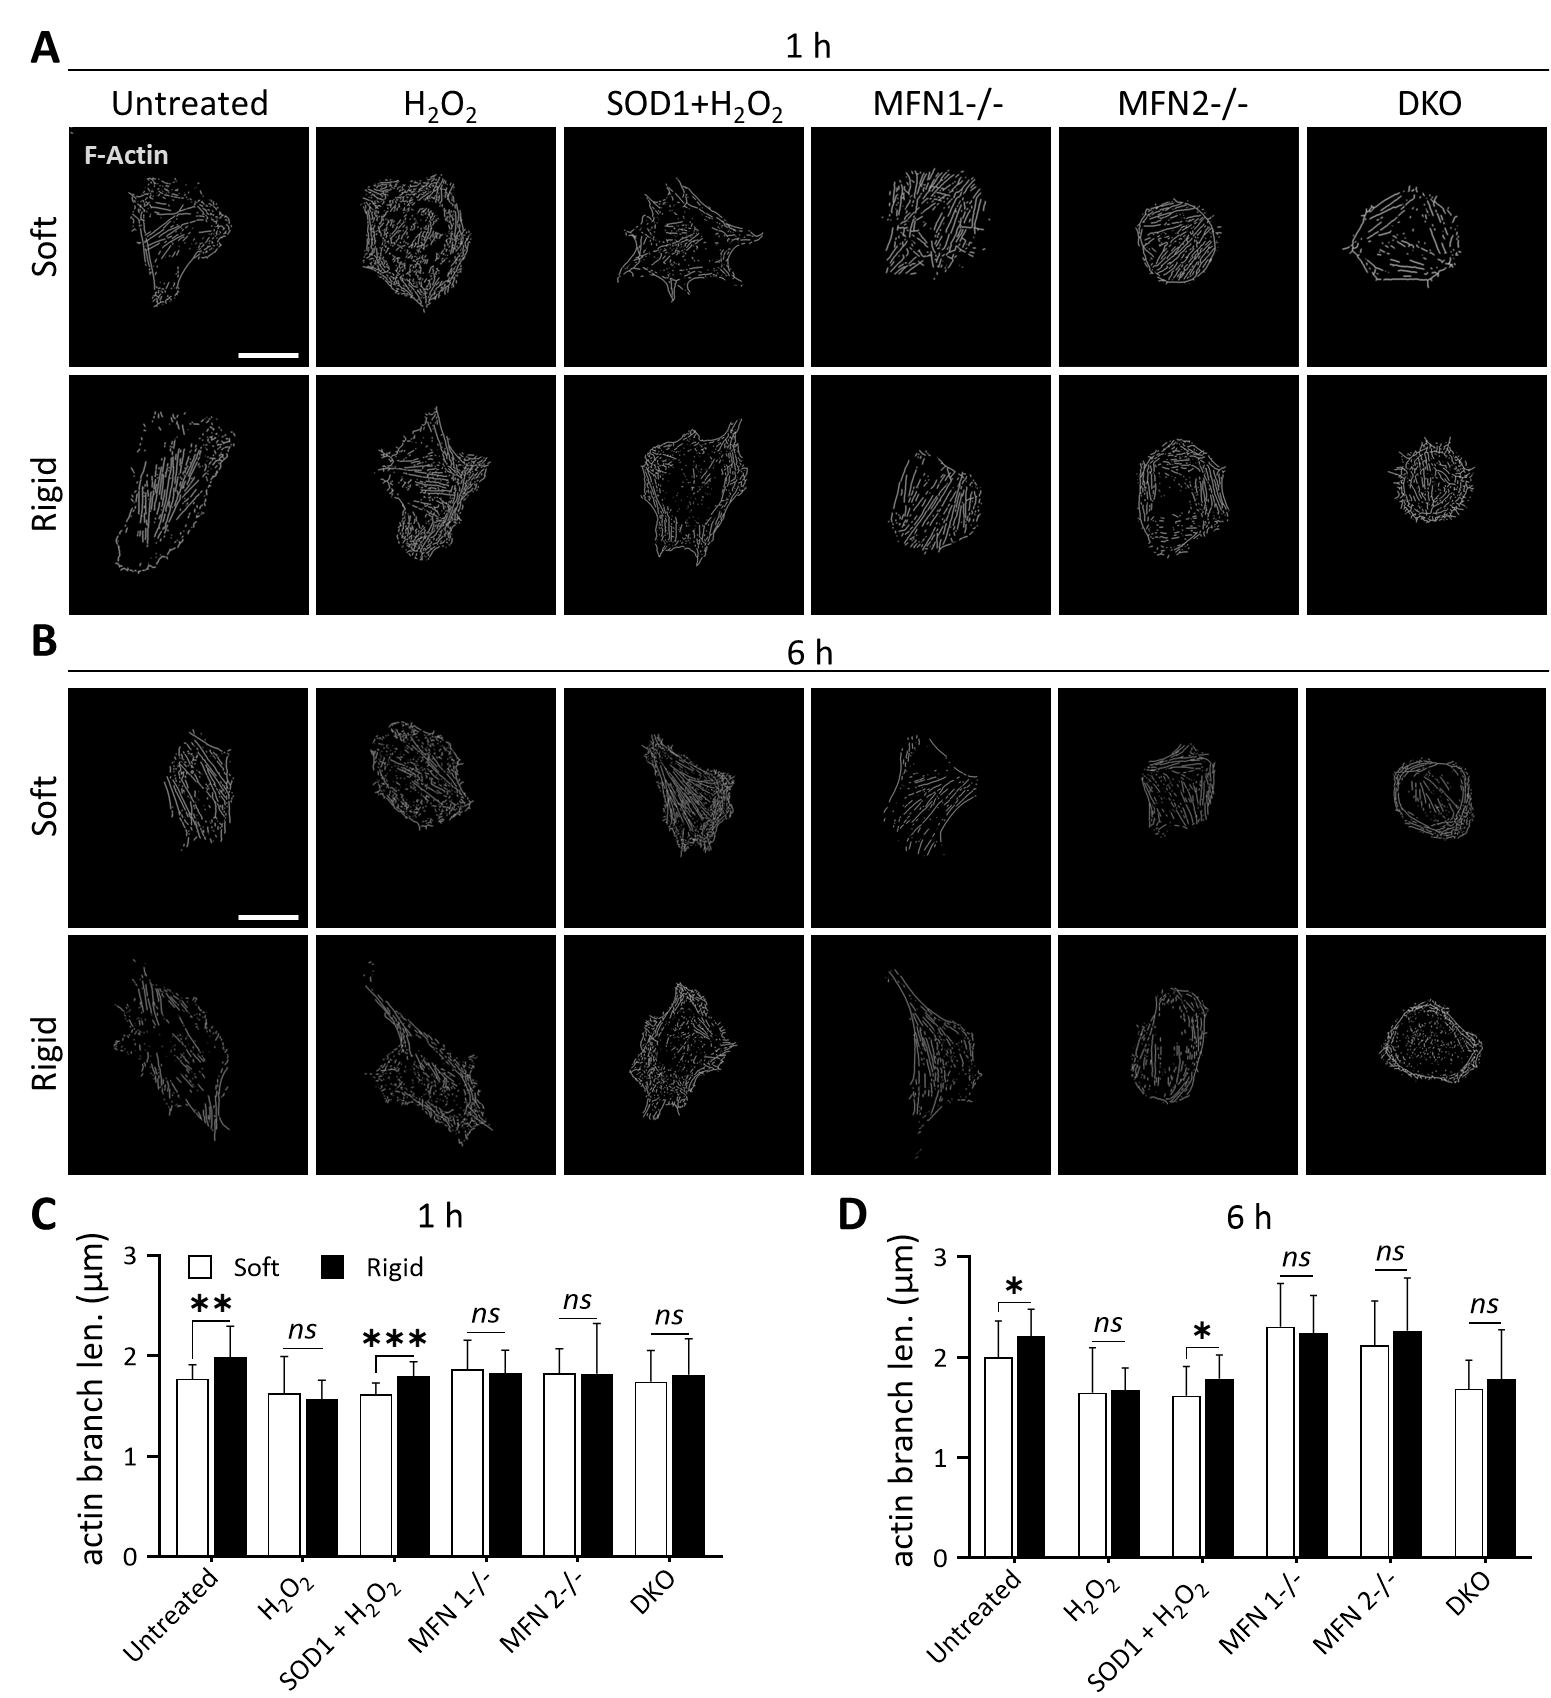
**

**Fig. S2.** Stiffness-associated increases in actin branch length are reduced by oxidative stress and MFN deficiency, while SOD1 co-treatment partially restores stiffness sensitivity. **(**A, B) Representative skeletonized F-actin images used for actin branch analysis across untreated, 200 µM H2O2-treated, SOD1 + H2O2 co-treated and MFN-deficient MEFs on substrates of increasing stiffness (soft and rigid) at (A) 1 h and (B) 6 h spreading (scale bars: 30 μm). (C) Quantification of average actin branch length at 1 h across conditions (n = 30). (D) Quantification of average actin branch length at 6 h (n = 30). Each bar represents mean ± standard deviation (SD). Statistical significance is indicated as ns, not significant; **P* < 0.05; ***P* < 0.01; ****P* < 0.001. Statistical significance was determined by using independent samples *t*-tests.
